# Supplementary material
Source: Elsevier journal article supplement (https://www.sciencedirect.com/science/article/pii/S0120563316300687)
Supplement: mmc1 [file S0120563316300687:mmc1.docx]

**ANEXOS**

**Anexo 1.** Definición operativa de las complicaciones respiratorias en pacientes llevados a cirugía cardiovascular (modificada de las guías de *society of thoracy surgeons (sts)*.)

| **Complicación respiratoria** | **Definición** |
| --- | --- |
| Ventilación mecánica prolongada | Pacientes que tuvieron ventilación mecánica postoperatoria por más de 24 horas. No se incluye el tiempo de ventilación que requiriese en caso de eventual reintervención. |
| Tromboembolismo pulmonar (TEP) | Pacientes con tromboembolismo pulmonar diagnosticado radiológicamente con gammagrafía ventilación/perfusión, arteriografía o TAC con protocolo angiográfico pulmonar, en donde se evidencien signos compatibles con obstrucción o defectos de llenado arteriales pulmonares causando oclusión parcial o total de flujo sanguíneo a los pulmones. |
| Neumotórax | Pacientes con evidencia de aire en el espacio pleural diagnosticado por rayos X de tórax. |
| Hemotórax | Pacientes con hemotórax definido con presencia de sangre en el espacio pleural que pude requerir drenaje con tubo a tórax. |
| Neumonía | Pacientes con neumonía diagnosticada según criterios clínicos, radiológicos de opacidades alveolares, y microbiológicos de cultivo de secreción bronquial, lavado bronquial. |
| Derrame pleural | Pacientes con derrame pleural diagnosticado por radiología o ecografía de tórax, que requiere o no drenaje por toracentesis, inserción de tubo a tórax o manejo médico. |
| Edema pulmonar | Pacientes con diagnóstico clínico (taquipnea, tos y estertores crepitantes pulmonares) y radiológico de edema pulmonar (líquido en el intersticio pulmonar, alvéolos, bronquios y/o bronquiolos). |
| Atelectasia | Paciente con evidencia de colapso de una región pulmonar periférica, segmentaria o lobar, o bien al colapso masivo de uno o ambos pulmones, evidenciado en rayos X de tórax. |
